# Supplementary material for: Can magnetotransport properties provide insight into the functional groups in semiconducting MXenes?
Source: Royal Society of Chemistry journal article supplement (doi:10.1039/d2nr06409j), 2023-01-01
Supplement: d2nr06409j1.pdf [file d2nr06409j1.pdf]

## Electronic Supplementary Information

# Can magneto-transport properties provide insight into the functional groups in semiconducting MXenes?

Namitha Anna Koshi,<sup>a</sup> Anup Kumar Mandia,<sup>b</sup> Bhaskaran Muralidharan,<sup>b</sup> Seung-Cheol Lee,<sup>c,\*</sup> and Satadeep Bhattacharjee<sup>a,\*</sup>

<sup>a</sup>*Indo-Korea Science and Technology Center (IKST), Jakkur, Bengaluru 560065, India*

<sup>b</sup>*Department of Electrical Engineering, Indian Institute of Technology Bombay, Powai, Mumbai-400076, India*

<sup>c</sup>*Electronic Materials Research Center, KIST, Seoul 136-791, South Korea*

\*E-mail: leesc@kist.re.kr, s.bhattacharjee@ikst.res.in

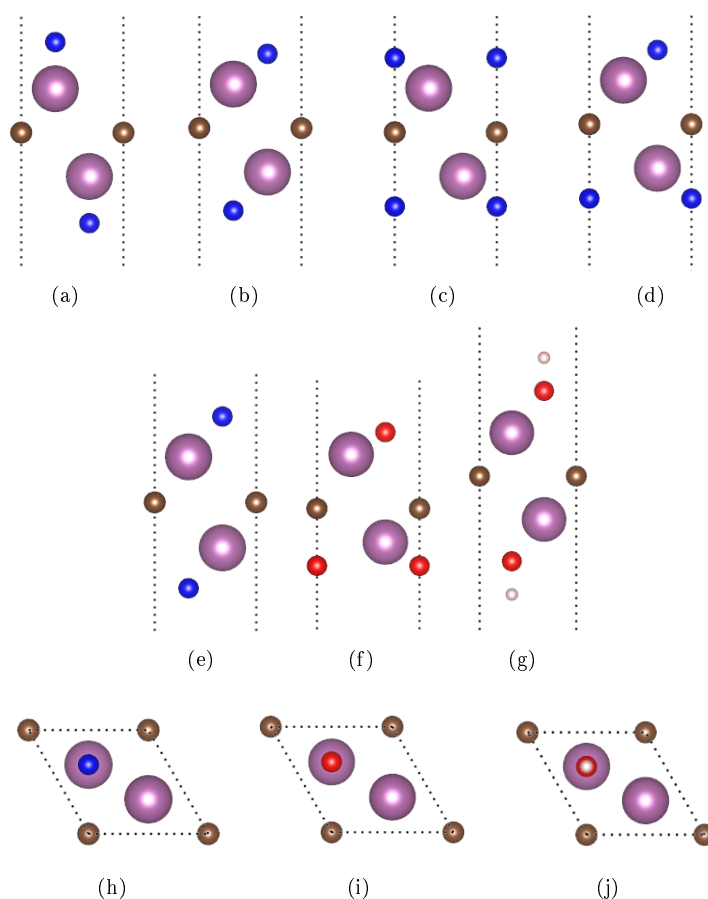

Figure S1: Side view of Sc<sub>2</sub>CF<sub>2</sub> (a) I, (b) II, (c) III and (d) IV configurations. Side and top view of optimized structure of Sc<sub>2</sub>C functionalized by (e,h) F, (f,i) O and (g,j) OH. Lavendar, brown, blue, red and white balls correspond to Sc, C, F, O and H atoms respectively.

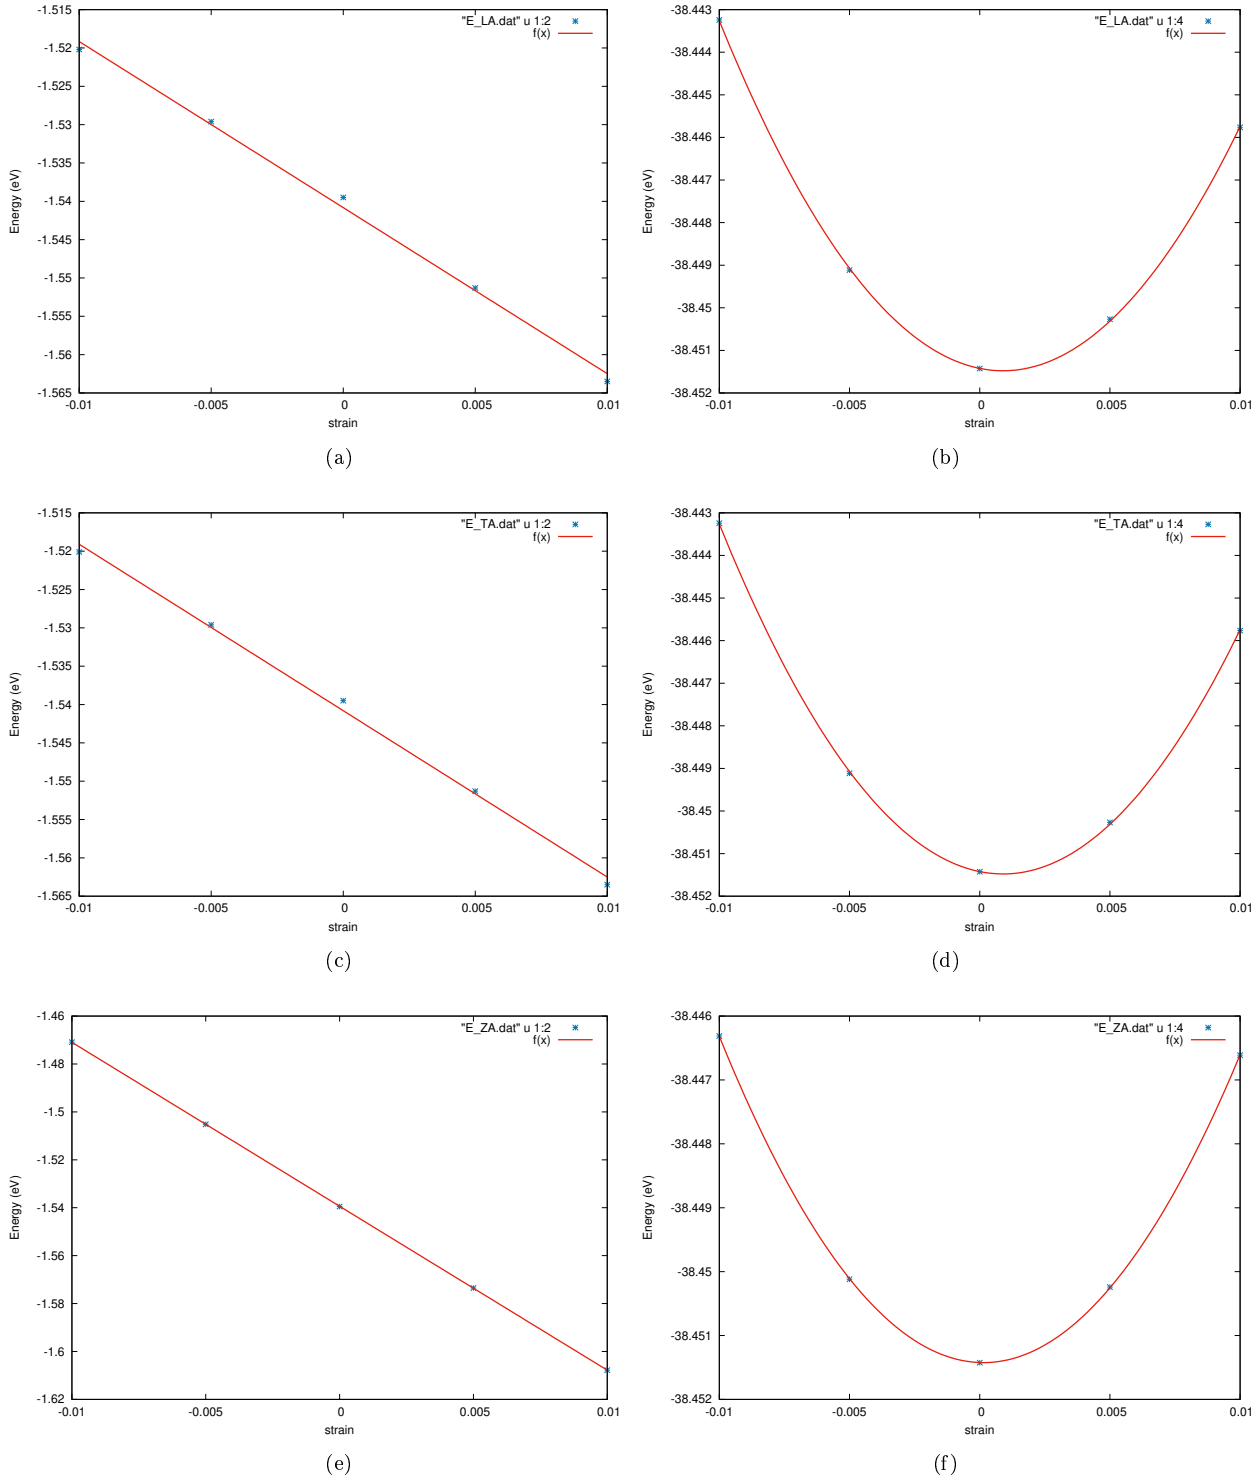

Figure S2: For  $\text{Sc}_2\text{CF}_2$ , the conduction band edge shift position for uniaxial strain along (a) x, (c) y, and (e) z directions. The relationship between total energy and strain along (b) x, (d) y, and (f) z directions are given for  $\text{Sc}_2\text{CF}_2$ .

Table S1: Deformation potential calculation for  $\text{Sc}_2\text{CF}_2$ :  $E(\epsilon)=a\epsilon+b$ ,  $D_A=\frac{\partial E}{\partial \epsilon}=a$

|                | LA            | TA            | ZA            |
|----------------|---------------|---------------|---------------|
| Parameter a    | -2.166        | -2.17         | -6.842        |
| Standard error | $\pm 0.07429$ | $\pm 0.07243$ | $\pm 0.0006$  |
| Parameter b    | -1.541        | -1.541        | -1.539        |
| Standard error | $\pm 0.00053$ | $\pm 0.00051$ | $\pm 0.00004$ |

Table S2: Elastic moduli calculation for  $\text{Sc}_2\text{CF}_2$ :  $E(\epsilon)=a\epsilon^2+b\epsilon+c$ ,  $C=\frac{\partial^2 E}{\partial \epsilon^2}=2a$

|                | LA            | TA            | ZA             |
|----------------|---------------|---------------|----------------|
| Parameter a    | 69.218        | 69.205        | 49.620         |
| Standard error | $\pm 0.522$   | $\pm 0.517$   | $\pm 0.142$    |
| Parameter b    | -0.124        | -0.124        | -0.014         |
| Standard error | $\pm 0.0031$  | $\pm 0.0031$  | $\pm 0.0008$   |
| Parameter c    | -38.451       | -38.451       | -38.451        |
| Standard error | $\pm 0.00003$ | $\pm 0.00003$ | $\pm 0.000009$ |

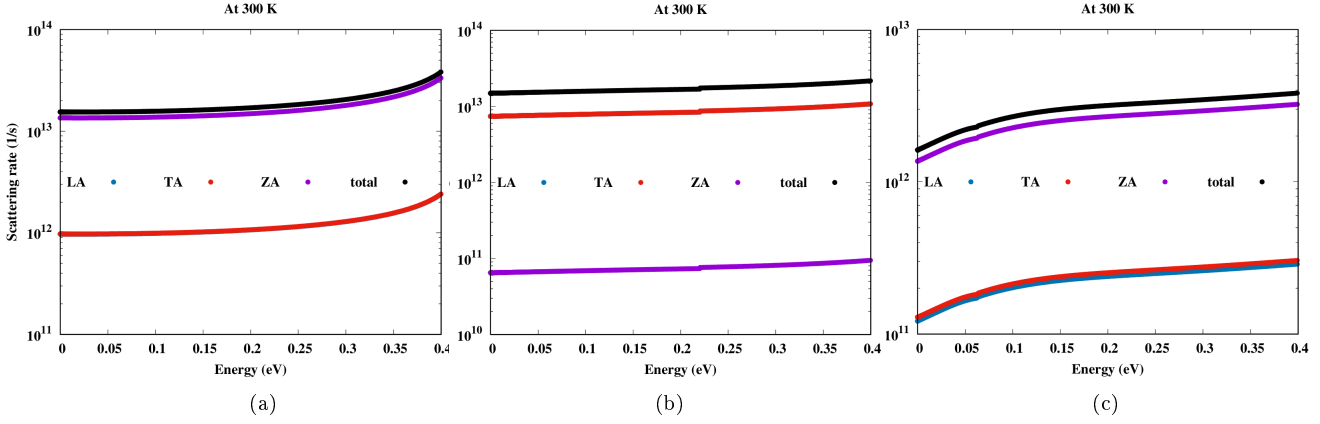

Figure S3: Scattering rates versus energy due to acoustic phonons: (a)  $\text{Sc}_2\text{CF}_2$ , (b)  $\text{Sc}_2\text{CO}_2$  and (c)  $\text{Sc}_2\text{C}(\text{OH})_2$ .

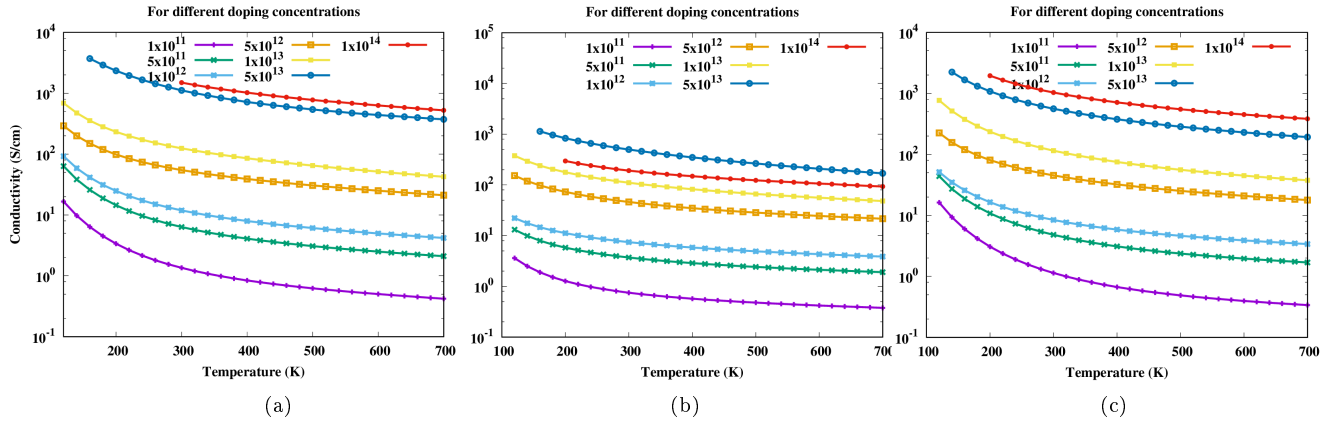

Figure S4: Conductivity as a function of temperature: (a)  $\text{Sc}_2\text{CF}_2$ , (b)  $\text{Sc}_2\text{CO}_2$  and (c)  $\text{Sc}_2\text{C}(\text{OH})_2$ .

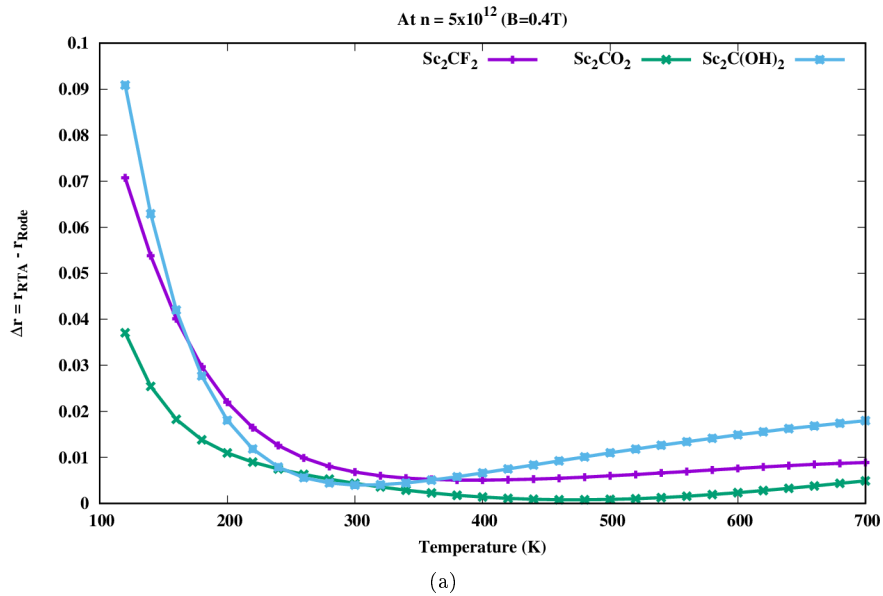

Figure S5: For a given concentration ( $n=5 \times 10^{12}$  cm $^{-2}$ ), the difference in Hall scattering factor  $\Delta r$  calculated using RTA and Rode approach as a function of temperature.

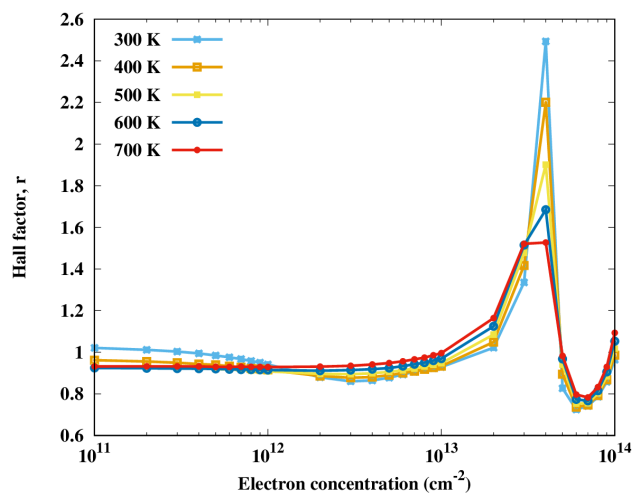

(a)

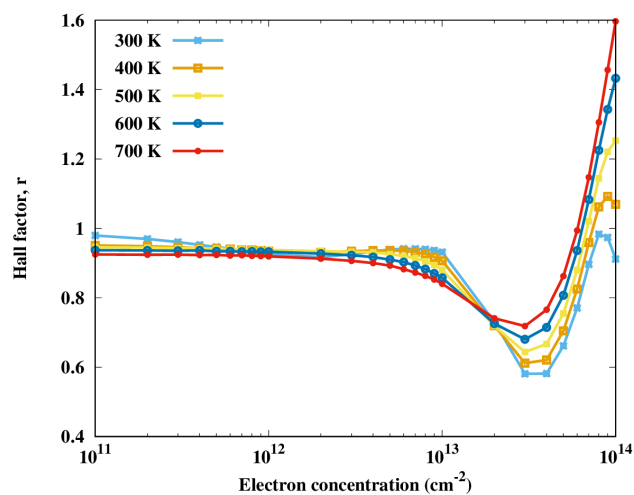

(b)

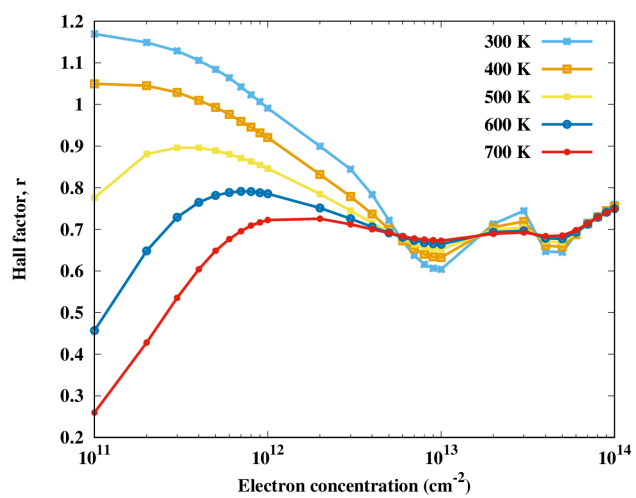

(c)

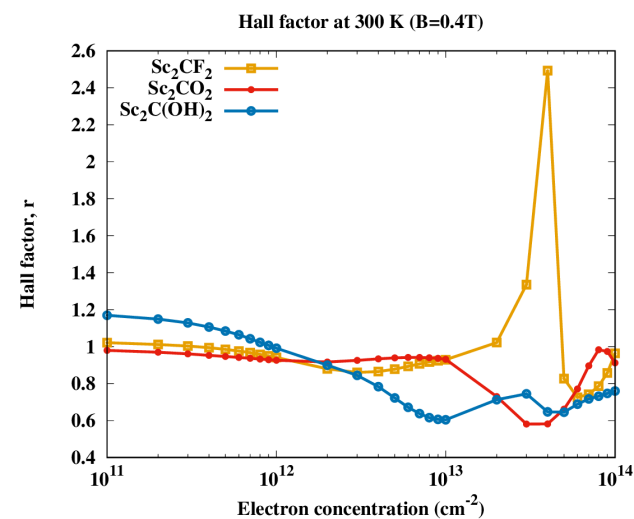

(d)

Figure S6: The Hall scattering factor as a function of concentration at different temperatures (a)  $\text{Sc}_2\text{CF}_2$ , (b)  $\text{Sc}_2\text{CO}_2$  and (c)  $\text{Sc}_2\text{C}(\text{OH})_2$ . (d) Hall factor of  $\text{Sc}_2\text{CF}_2$ ,  $\text{Sc}_2\text{CO}_2$  and  $\text{Sc}_2\text{C}(\text{OH})_2$  at 300 K.

Table S3: At Fermi energy ( $E_F$ ) for doping concentration of  $4 \times 10^{13} \text{ cm}^{-2}$  and temperature of 300 K

| Material                           | $g(E)$                | $h(E)$                  | $\frac{h(E)}{(g(E))^2}$ |
|------------------------------------|-----------------------|-------------------------|-------------------------|
| $\text{Sc}_2\text{CF}_2$           | $1.63 \times 10^{-7}$ | $-5.97 \times 10^{-12}$ | -224.69                 |
| $\text{Sc}_2\text{CO}_2$           | $4.52 \times 10^{-7}$ | $-3.60 \times 10^{-11}$ | -176.21                 |
| $\text{Sc}_2\text{C}(\text{OH})_2$ | $6.80 \times 10^{-7}$ | $-8.96 \times 10^{-11}$ | -193.77                 |
